# Supplementary material
Source: Springer Nature journal article supplement (https://cris.unibo.it/retrieve/21ef1112-a98d-48d5-a4c2-1ace47e2f3c5/40104_2026_1355_MOESM1_ESM.pdf)
Supplement: MOESM1 [file 40104_2026_1355_MOESM1_ESM.pdf]

**Supplementary Table S1.** Fatty acid (FA) profile of the two transition diets.

| Item                                      | Diet <sup>1</sup> (g/100g as feed) <sup>2</sup> |           |
|-------------------------------------------|-------------------------------------------------|-----------|
|                                           | CO                                              | TRT       |
| C8:0                                      | 8.09                                            | 7.47      |
| C10:0                                     | 3.88                                            | 4.23      |
| C11:0                                     | 2.67                                            | 3.45      |
| C12:0                                     | 12.84                                           | 12.71     |
| C14:0                                     | 41.62                                           | 35.01     |
| C15:0                                     | 6.91                                            | 5.55      |
| C16:0                                     | 2,191.45                                        | 2,076.24  |
| C16:1 <i>6trans</i> + C16:1 <i>7trans</i> | 21.34                                           | 11.59     |
| C16:1 <i>7cis</i>                         | 5.34                                            | 4.39      |
| C16:1 <i>9cis</i>                         | 23.27                                           | 26.04     |
| C17:0                                     | 20.18                                           | 25.66     |
| C17:1 <i>9cis</i>                         | 0                                               | 5.04      |
| C18:0                                     | 528.72                                          | 545.31    |
| C18:1 <i>9cis</i>                         | 3,843.96                                        | 3,888.37  |
| C18:1 <i>11cis</i>                        | 140.68                                          | 160.17    |
| C18:2 <i>8trans,13trans</i>               | 0                                               | 5.4       |
| C18:2 <i>9cis,12cis</i>                   | 7,581.28                                        | 7,647.59  |
| C20:0                                     | 0                                               | 4.02      |
| C18:3 <i>6cis,9cis,12cis</i>              | 26.42                                           | 34.6      |
| C18:3 <i>9cis,12cis,15cis</i>             | 1,728.6                                         | 1,580.92  |
| C18:4 <i>6cis,9cis,12cis,15cis</i>        | 0                                               | 8.27      |
| C20:2 <i>11cis,14cis</i>                  | 4.58                                            | 5.44      |
| C22:0                                     | 13.3                                            | 0         |
| C20:3 <i>8cis,11cis,14cis</i>             | 46.87                                           | 38.08     |
| C21:2 <i>12cis,15cis</i>                  | 5.34                                            | 0         |
| C23:0                                     | 6.98                                            | 6.2       |
| C24:0                                     | 15                                              | 18.54     |
| TOTAL                                     | 16,371.2                                        | 16,253.8  |
| SFA <sup>3</sup>                          | 2,851.65                                        | 2,744.38  |
| MUFA <sup>4</sup>                         | 4,034.58                                        | 4,095.6   |
| PUFA <sup>5</sup>                         | 9,393.09                                        | 9,320.31  |
| UFA <sup>6</sup>                          | 13,427.67                                       | 13,415.9  |
| PUFA n-6 <sup>7</sup>                     | 7,664.49                                        | 7,725.71  |
| PUFA n-3 <sup>8</sup>                     | 1,728.6                                         | 1,589.19  |
| SCFA <sup>9</sup>                         | 72.52                                           | 73.7      |
| MCFA <sup>10</sup>                        | 16,159.77                                       | 16,060.15 |
| LCFA <sup>11</sup>                        | 92.07                                           | 72.28     |
| SFA/UFA                                   | 1.22                                            | 1.21      |
| PUFA/SFA                                  | 0.57                                            | 0.57      |
| PUFA n-6/PUFA n-3                         | 4.43                                            | 4.86      |

Diet<sup>1</sup>: CO = control diet with 12.33 MJ/kg of ME and 0.70% SID Lys; TRT = treatment diet with 12.97 MJ/kg of ME and 0.85% SID Lys.

g/100g as feed<sup>2</sup>: g per 100 g of product's total quantity

SFA<sup>3</sup>: Saturated Fatty Acids.

MUFA<sup>4</sup>: Monounsaturated Fatty Acids.

PUFA<sup>5</sup>: Polyunsaturated Fatty Acids.

UFA<sup>6</sup>: Unsaturated Fatty Acids.

PUFA n-6<sup>7</sup>: omega 6 PUFAs

PUFA n-3<sup>8</sup>: omega 3 PUFAs

SCFA<sup>9</sup>: Short Chain Fatty Acids.

MCFA<sup>10</sup>: Medium Chain Fatty Acids.

LCFA<sup>11</sup>: Long Chain Fatty Acids.
